# Supplementary material
Source: publisher figshare collection journal article supplement (https://future-science-group.figshare.com/articles/dataset/_/21494091)
Supplement: Supplementary file 1 [file 1]

**Table S1** Sequences of the primers used in the study.

| Primer | Sequence |
| --- | --- |
| qPCR primers | |
| *Hnf4α F* | 5’-CACGCGGAGGTCAAGCTAC-3’ |
| *Hnf4α R* | 5’-CCCAGAGATGGGAGAGGTGAT-3’ |
| *Hgf1 F* | 5’-CTAGCCTCTGTCCCTTACCCA-3’ |
| *Hgf1 R* | 5’-TGGAGCACTTTCTGTTGAGGT-3’ |
| *Foxa2 F* | 5’-CCCTACGCCAACATGAACTCG-3’ |
| *Foxa2 R* | 5’-GTTCTGCCGGTAGAAAGGGA-3’ |
| *dCas9 F* | 5’-GTGGACGCTATCGTGCCTCAG-3’ |
| *dCas9 R* | 5’-GCCGCCAGTAGTTCTTCATCTT-3’ |
| *P65 F* | 5’-AGGCTTCTGGGCCTTATGTG-3’ |
| *P65 R* | 5’-AGGCTTCTGGGCCTTATGTG-3’ |
| *Hnf4α gRNA F* | 5’-GAGGAGTTTTAGAGCTAGGCCA-3’ |
| *Hnf4α gRNA R* | 5’-TGGCCAAGTTGATAACGGAC-3’ |
| *Hgf1 gRNA F* | 5’-GGGCTCATTTGGCAGAAGTTT-3’ |
| *Hgf1 gRNA R* | 5’-GTTGGCCAAGTTGATAACGGA-3’ |
| *Foxa2 gRNA F* | 5’-TGGTTTTAGAGCTAGGCCAACA-3’ |
| *Foxa2 gRNA R* | 5’-TGGCCAAGTTGATAACGGACTA-3’ |
| *Col1 F* | 5’-GTAACTTCGTGCCTAGCAACA-3’ |
| *Col1 R* | 5’-CCTTTGTCAGAATACTGAGCAGC-3’ |
| *α-sam F* | 5’-GTCCCAGACATCAGGGAGTAA-3’ |
| *α-sam R* | 5’-TCGGATACTTCAGCGTCAGGA-3’ |
| *Crbp1 F* | 5’-CTGAGCAATGAGAATTTCGAGGA-3’ |
| *Crbp1 R* | 5’-GCGGTCGTCTATGCCTGTC-3’ |
| *E-cad F* | 5’-CAGGTCTCCTCATGGCTTTGC-3’ |
| *E-cad R* | 5’-CTTCCGAAAAGAAGGCTGTCC-3’ |
| *Ck18 F* | 5’-CAGCCAGCGTCTATGCAGG-3’ |
| *Ck18 R* | 5’-CTTTCTCGGTCTGGATTCCAC-3’ |
| *Asgpr1 F* | 5’-TGAGCACCCAGGGAAGTAGT-3’ |
| *Asgpr1 R* | 5’-CCATTGCCCCGAAATGCAG-3’ |
| *Alb F* | 5’-TGCTTTTTCCAGGGGTGTGTT-3’ |
| *Alb R* | 5’-TTACTTCCTGCACTAATTTGGCA-3’ |
| *A1at F* | 5’-ACCGAGTTCTCCTATTGGTTGG-3’ |
| *A1at R* | 5’-CCGGGTTTTTCTTCATAGAGGG-3’ |
| *Desmin F* | 5’-GTGGATGCAGCCACTCTAGC-3’ |
| *Desmin R* | 5’-TTAGCCGCGATGGTCTCATAC-3’ |
| *Vimentin F* | 5’-CGTCCACACGCACCTACAG-3’ |
| *Vimentin R* | 5’-GGGGGATGAGGAATAGAGGCT-3’ |
| *Tgf-β1 F* | 5’-CTCCCGTGGCTTCTAGTGC-3’ |
| *Tgf-β1 R* | 5’-GCCTTAGTTTGGACAGGATCTG-3’ |
| *Tnfα F* | 5’-CCCTCACACTCAGATCATCTTCT-3’ |
| *Tnfα R* | 5’-GCTACGACGTGGGCTACAG-3’ |
| *Mcp1 F* | 5’-GAGGACAGATGTGGTGGGTTT-3’ |
| *Mcp1 R* | 5’-AGGAGTCAACTCAGCTTTCTCTT-3’ |
| *Il11 F* | 5’-TGTTCTCCTAACCCGATCCCT-3’ |
| *Il11 R* | 5’-CAGGAAGCTGCAAAGATCCCA-3’ |
| *Il13 F* | 5’-CCTGGCTCTTGCTTGCCTT-3’ |
| *Il13 R* | 5’-GGTCTTGTGTGATGTTGCTCA-3’ |
| *Col1α1 F* | 5’-GCTCCTCTTAGGGGCCACT-3’ |
| *Col1α1 R* | 5’-CCACGTCTCACCATTGGGG-3’ |
| *Col3α1 F* | 5’-CCTGGCTCAAATGGCTCAC-3’ |
| *Col3α1 R* | 5’-CAGGACTGCCGTTATTCCCG-3’ |
| *Ccn2 F* | 5’-GGGCCTCTTCTGCGATTTC-3’ |
| *Ccn2 R* | 5’-ATCCAGGCAAGTGCATTGGTA-3’ |
| *Gapdh F* | 5’-AGGTCGGTGTGAACGGATTTG-3’ |
| *Gapdh R* | 5’-TGTAGACCATGTAGTTGAGGTCA-3’ |
| Primers for plasmid construction | |
| *Hnf4α gRNA F* | 5’-CACCGGACAGTTTGAAAGAGAGGAG-3’ |
| *Hnf4α gRNA R* | 5’-AAACCTCCTCTCTTTCAAACTGTCC-3’ |
| *Hgf1 gRNA F* | 5’-CACCGCTGGGGCTCATTTGGCAGAAG-3’ |
| *Hgf1 gRNA R* | 5’-AAACCTTCTGCCAAATGAGCCCCAGC-3’ |
| *Foxa2 gRNA F* | 5’-CACCGGGCGAGGGGGTGGGGAGCTGG-3’ |
| *Foxa2 gRNA R* | 5’-AAACCCAGCTCCCCACCCCCTCGCCC-3’ |
| *NC gRNA F* | 5’-CACCGCCACTTGGCCTAAGGGTT-3’ |
| *NC gRNA R* | 5’-AAACCTCTCTCCACTAGCACTATGC-3’ |
| *Lamp5 F* | 5’-ATCCGCTAGCGGTCGCCACCATGTGCCTCTCTCCGGTT-3’ |
| *Lamp5 R* | 5’GTCACTCGAGCATAAAGGCAAGTACCCTTTGAA-3’ |
| *Lamp3 F* | 5’GTCACTCGAGGTCACATCCGGAGGTGCAGAATGGGAGATGAATTTCA-3’ |
| *Lamp3 R* | 5’-ATCCGGATCCTTAGTGTTACAGAGTCTGATATCC-3’ |
| *Rbp4 F* | 5’ATGCTCGAGACGAGCGCGACTGCAGGGTGAG-3’ |
| *Rbp4 R* | 5’ACCTCCGGACAAACTGTTTCTGGAGGGCC-3’ |
